# Supplementary material
Source: HighWire-hosted journal article supplement (https://bmjopen.bmj.com/content/11/9/e050838)
Supplement: inline-supplementary-material-2 [file inline-supplementary-material-2.pdf]

Brundisini et al.

Economic evaluations of scaling up strategies of evidence-based health interventions: A systematic review protocol

Table. 1 - Search strategy in Ovid MEDLINE

**Medline-Ovid (2020-10-14)**

| Concepts                                          | Search strategy keywords                                                                                                                                                                                                                                                                                                                       | Search |
|---------------------------------------------------|------------------------------------------------------------------------------------------------------------------------------------------------------------------------------------------------------------------------------------------------------------------------------------------------------------------------------------------------|--------|
| Scaling (Controlled Vocabulary)                   | "diffusion of innovation"/ or Organizational Innovation/                                                                                                                                                                                                                                                                                       | #1     |
| Scaling (Free text)                               | ("scal* up" or "scal* out").ab,kf,kw,ti.                                                                                                                                                                                                                                                                                                       | #2     |
|                                                   | ((("scaling" or widespread or spread? or spreading or "rolling out" or "roll out" or "rolls out" or "rolled out" or upscaling or scalability or scalable) adj5 (innovation? or intervention? or technolog* or practice* or care or initiative* or program* or product? or therap* or service* or strateg* or change? or proces*)).ab,kf,kw,ti. | #3     |
|                                                   | ((bring* or brought or taking or take* or increas* or going or implement* or econom*) adj5 scal* adj5 (innovation? or intervention? or technolog* or practice* or care or initiative* or program* or product? or therap* or service* or strateg* or change? or proces*)).ab,kf,kw,ti.                                                          | #4     |
| Scaling (Free text)                               | 2 or 3 or 4                                                                                                                                                                                                                                                                                                                                    | #5     |
| Scaling                                           | 1 or 5                                                                                                                                                                                                                                                                                                                                         | #6     |
| Economic Evaluation (Controlled Vocabulary)       | "costs and cost analysis"/ or cost-benefit analysis/ or Economics, Dental/ or exp Economics, Hospital/ or Economics, Medical/ or Economics, Nursing/ or Economics, Pharmaceutical/                                                                                                                                                             | #7     |
| Economic Evaluation (Free text)                   | ("cost analysis" or "cost-benefit*" or "cost comparison*" or (cost* adj2 description*) or "cost-effective*" or "cost estimat*" or "cost minimization" or "cost-utility" or "Economic analys*" or "Economic evaluation*" or "net benefit*" or overhead or (value adj3 money)).ab,kf,kw,ti.                                                      | #8     |
| Economic Evaluation                               | 7 or 8                                                                                                                                                                                                                                                                                                                                         | #9     |
| Scaling AND Economic Evaluation                   | 6 and 9                                                                                                                                                                                                                                                                                                                                        | #10    |
| Scaling AND Economic Evaluation                   | Organizational Innovation/ec [Economics]                                                                                                                                                                                                                                                                                                       | #11    |
| Total Result                                      | 10 or 11                                                                                                                                                                                                                                                                                                                                       | #12    |
| Filter for abstract comment, editorial, protocol, | academic dissertation/ or clinical conference/ or clinical trial protocol/ or comment/ or editorial/ or meeting abstract/                                                                                                                                                                                                                      | #13    |

Brundisini et al.

Economic evaluations of scaling up strategies of evidence-based health interventions: A systematic review protocol

| Concepts                                                             | Search strategy keywords                                                                                                                                                                                  | Search |
|----------------------------------------------------------------------|-----------------------------------------------------------------------------------------------------------------------------------------------------------------------------------------------------------|--------|
| theses<br>(Controlled Vocabulary)                                    |                                                                                                                                                                                                           |        |
| Filter for abstract comment, editorial, protocol, theses (Free text) | ("clinical conference*" or comment* or congress* or "consensus development conference*" or editorial or "english abstract*" or lecture*).pt.                                                              | #14    |
|                                                                      | (Comment* or editorial or Protocol).ti.                                                                                                                                                                   | #15    |
| Filter for abstract comment, editorial, protocol, theses             | 13 or 14 or 15                                                                                                                                                                                            | #16    |
| Without the filter for abstract comment, editorial, protocol, theses | 12 not 16                                                                                                                                                                                                 | #17    |
| Filter for Review (Controlled Vocabulary)                            | META-ANALYSIS/                                                                                                                                                                                            | #18    |
| Filter for Review (Free text)                                        | ("systematic review*" or "overview review*" or "literature review*" or "scoping review*" or meta-analy* or metaanaly* or meta-synthesis or metasyntesis or ((research or literature) adj3 synthesis)).ti. | #19    |
|                                                                      | (cinahl or (cochrane adj3 trial*) or embase or medline or psyclit or (psycinfo not "psycinfo database") or pubmed or scopus or "sociological abstracts" or "web of science").ab.                          | #20    |
|                                                                      | ("cochrane database of systematic reviews" or evidence report technology assessment or evidence report technology assessment summary).jn.                                                                 | #21    |
|                                                                      | ((review* or "Meta Analysis" or guideline* or "practice guideline*" or "systematic review*") not "Book review" ).pt.                                                                                      | #22    |
|                                                                      | 19 or 20 or 21 or 22                                                                                                                                                                                      | #23    |
| Filter for review                                                    | 18 or 23                                                                                                                                                                                                  | #24    |
| Without the filter for review                                        | 17 not 24                                                                                                                                                                                                 | #25    |
